# Supplementary material for: Epidemiological trends in opioid-only and opioid/polysubstance-related death rates among American Indian/Alaska Native populations from 1999 to 2019: a retrospective longitudinal ecological study
Source: HighWire-hosted journal article supplement (doi:10.1136/bmjopen-2021-053686), 2022-05-01
Supplement: bmjopen-2021-053686supp001_data_supplement.pdf [file bmjopen-2021-053686supp001_data_supplement.pdf]

## Supplement

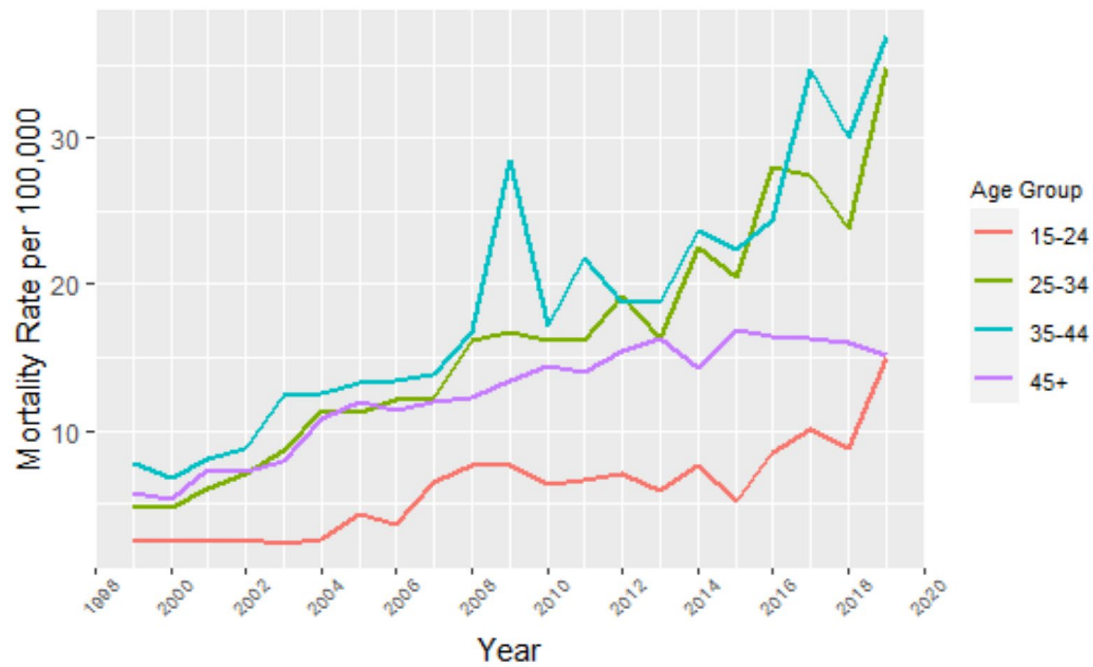

**Figure 1a:** Trends in opioid-only<sup>1</sup> death rates among US NH-AIAN 15 and older by age groups

<sup>1</sup>Opioid-only (underlying: X40-44, X60-64, X85, Y10-Y14; multiple: T40.0, T40.1, T40.2, T40.3, T40.4, T40.6);

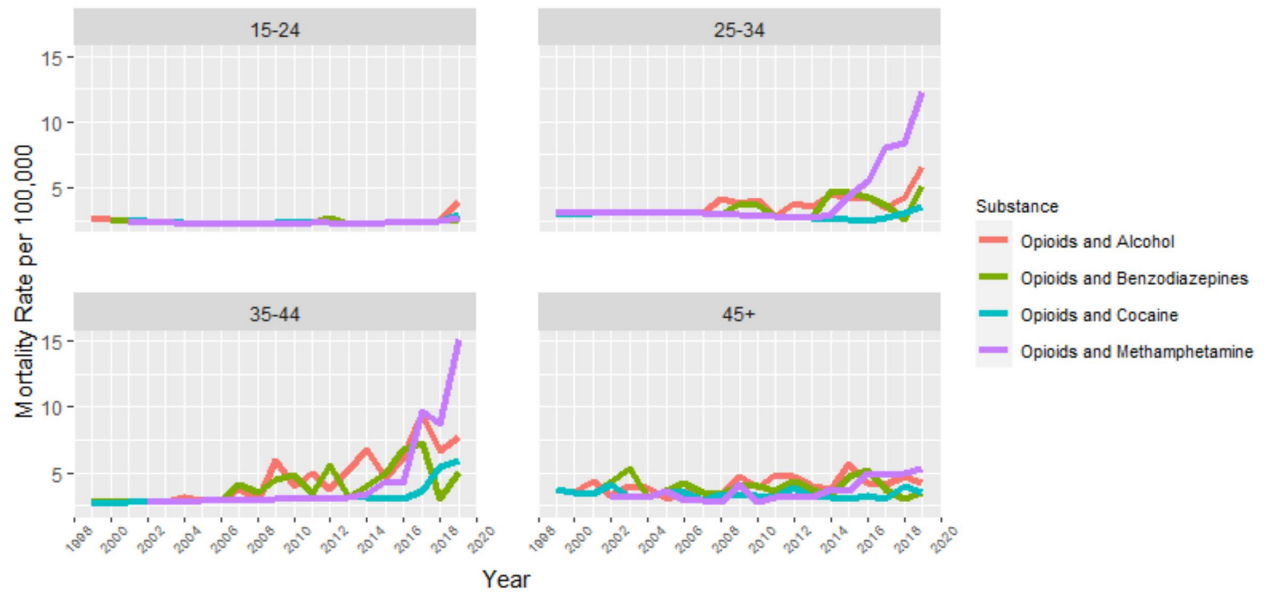

**Figure 1b:** Trends in opioid combination<sup>1</sup> death rates among US NH-AIAN age groups 15 and older by substance combination type

<sup>1</sup> Opioids and methamphetamine (underlying: X40-44, X60-64, X85, Y10-Y14; multiple: T40.0, T40.1, T40.2, T40.3, T40.4, T40.6 and T43.6);

Opioids and cocaine (underlying: X40-44, X60-64, X85, Y10-Y14; multiple: T40.0, T40.1, T40.2, T40.3, T40.4, T40.6 and T40.5);  
Opioids and benzodiazepines (underlying: X40-44, X60-64, X85, Y10-Y14; multiple: T40.0, T40.1, T40.2, T40.3, T40.4, T40.6 and T42.4);

Opioids and alcohol (underlying: R78.0, X40-45, X60-65, X85, Y10-Y15; multiple: T40.0, T40.1, T40.2, T40.3, T40.4, T40.6 and T51.0, T51.1, T51.9)

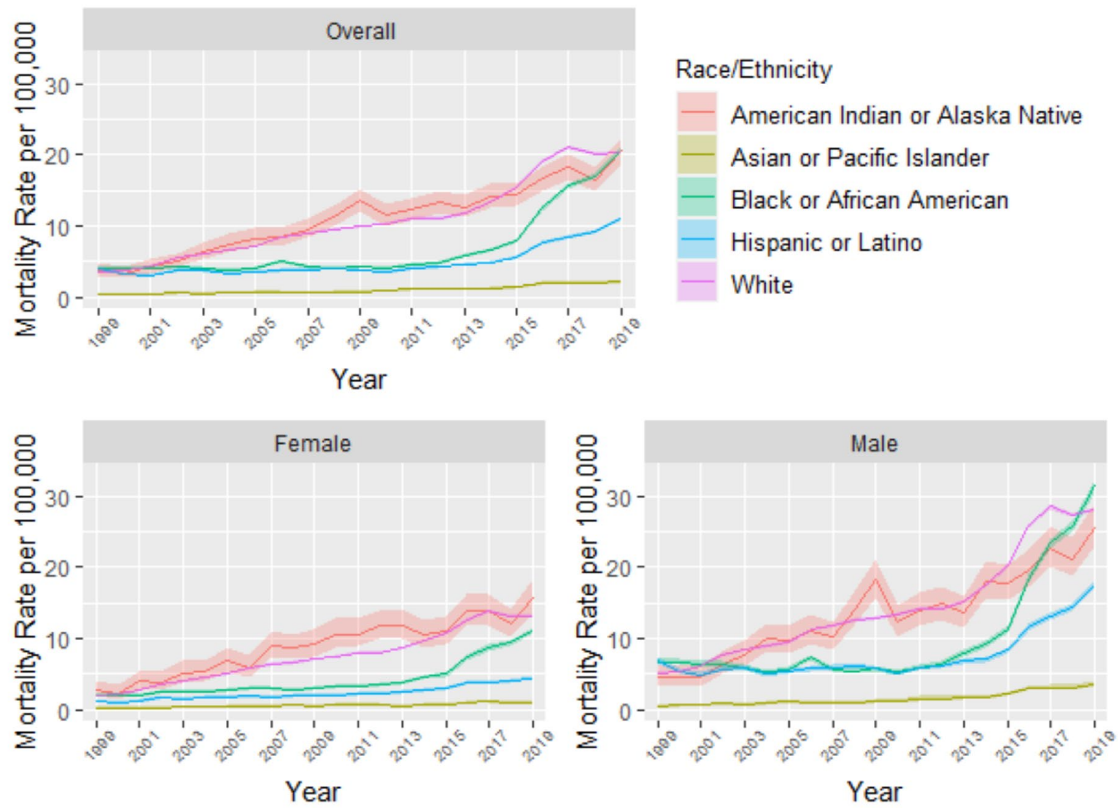

**Figure 2a:** Trends in opioid-only<sup>1</sup> death rates among US men and women 12 and older by race and ethnicity

<sup>1</sup> Opioid-only (underlying: X40-44, X60-64, X85, Y10-Y14; multiple: T40.0, T40.1, T40.2, T40.3, T40.4, T40.6);

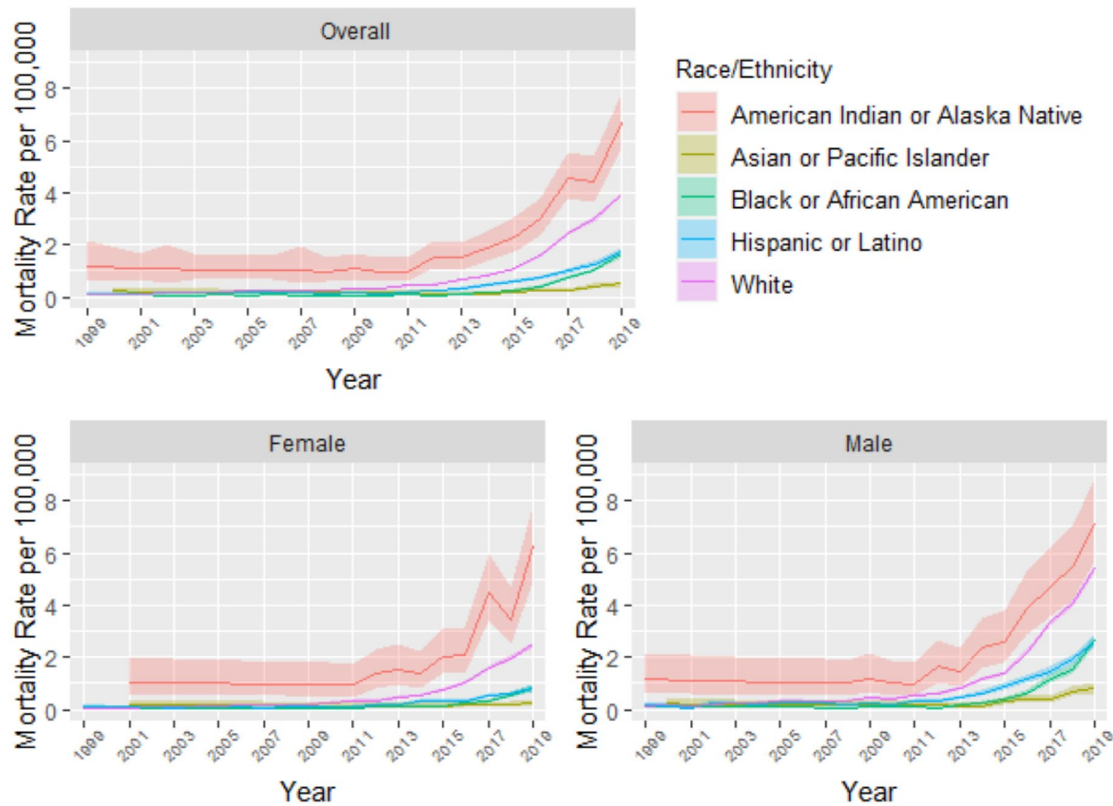

**Figure 2b:** Trends in opioid and methamphetamine<sup>1</sup> death rates among US men and women 12 and older by race and ethnicity

<sup>1</sup> Opioids and methamphetamine (underlying: X40-44, X60-64, X85, Y10-Y14; multiple: T40.0, T40.1, T40.2, T40.3, T40.4, T40.6 and T43.6);

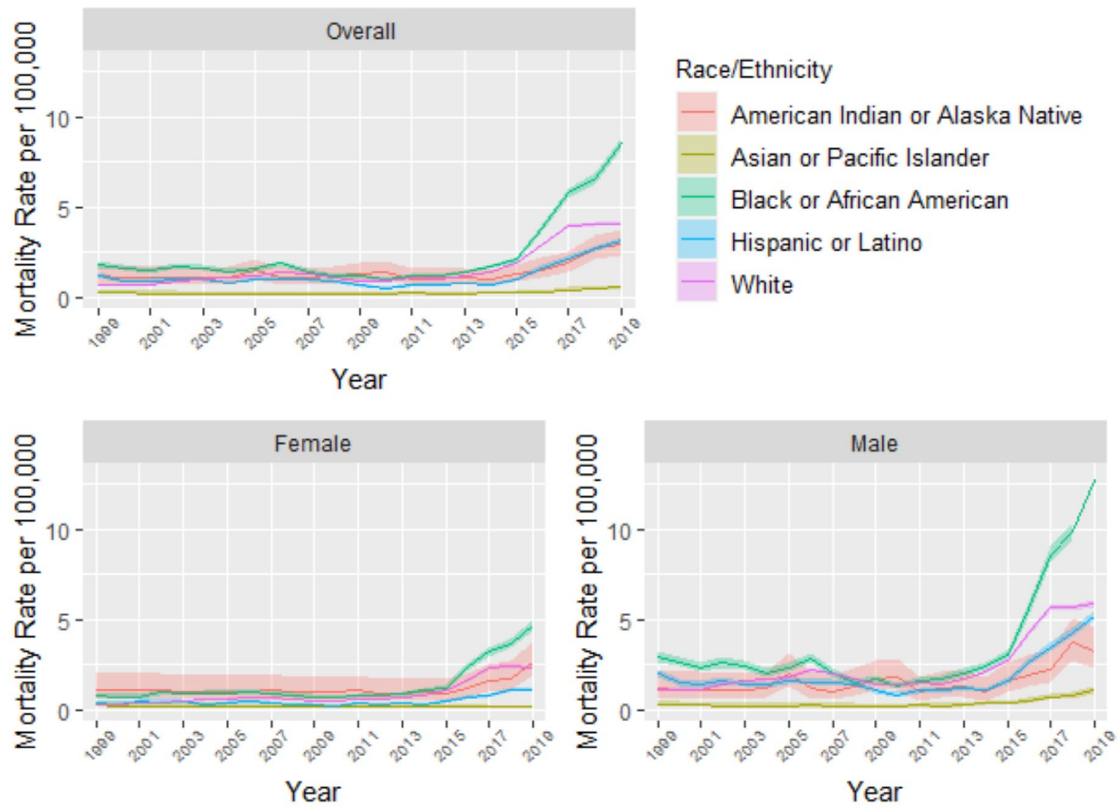

**Figure 2c:** Trends in opioid and cocaine<sup>1</sup> death rates among US men and women 12 and older by race and ethnicity

<sup>1</sup> Opioids and cocaine (underlying: X40-44, X60-64, X85, Y10-Y14; multiple: T40.0, T40.1, T40.2, T40.3, T40.4, T40.6 and T40.5)

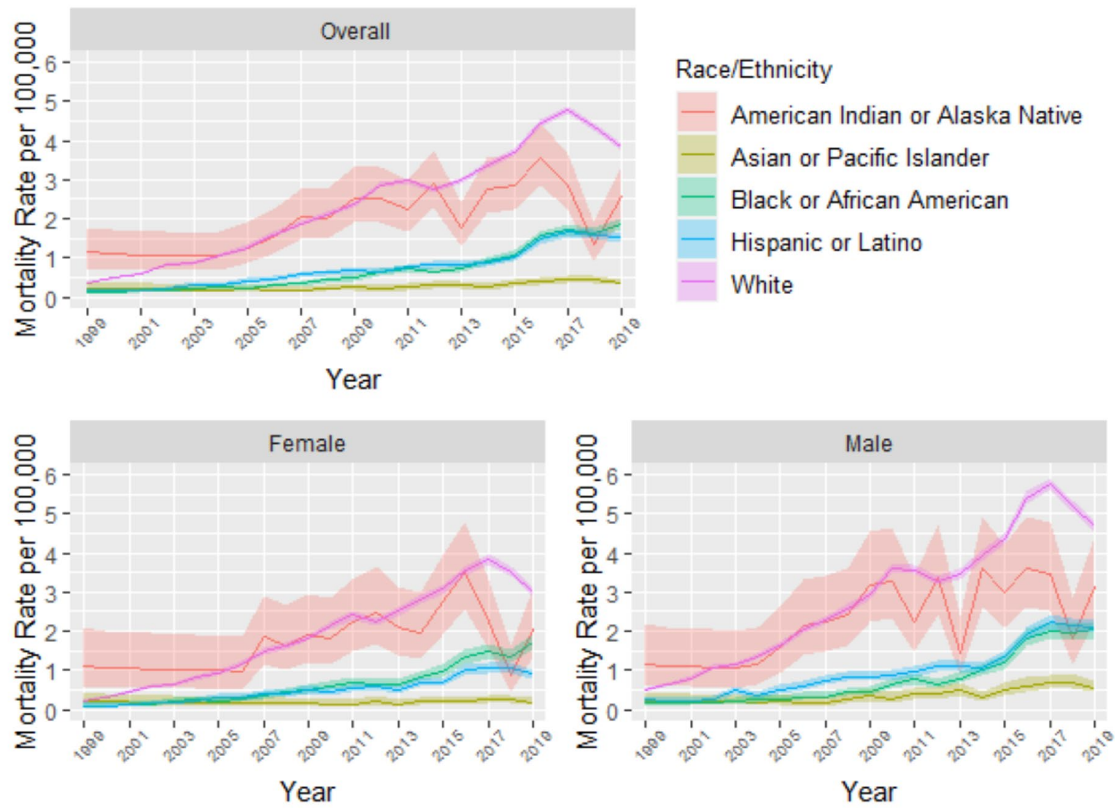

**Figure 2d:** Trends in opioid and benzodiazepine<sup>1</sup> death rates among US men and women 12 and older by race and ethnicity

<sup>1</sup> Opioids and benzodiazepines (underlying: X40-44, X60-64, X85, Y10-Y14; multiple: T40.0, T40.1, T40.2, T40.3, T40.4, T40.6 and T42.4)

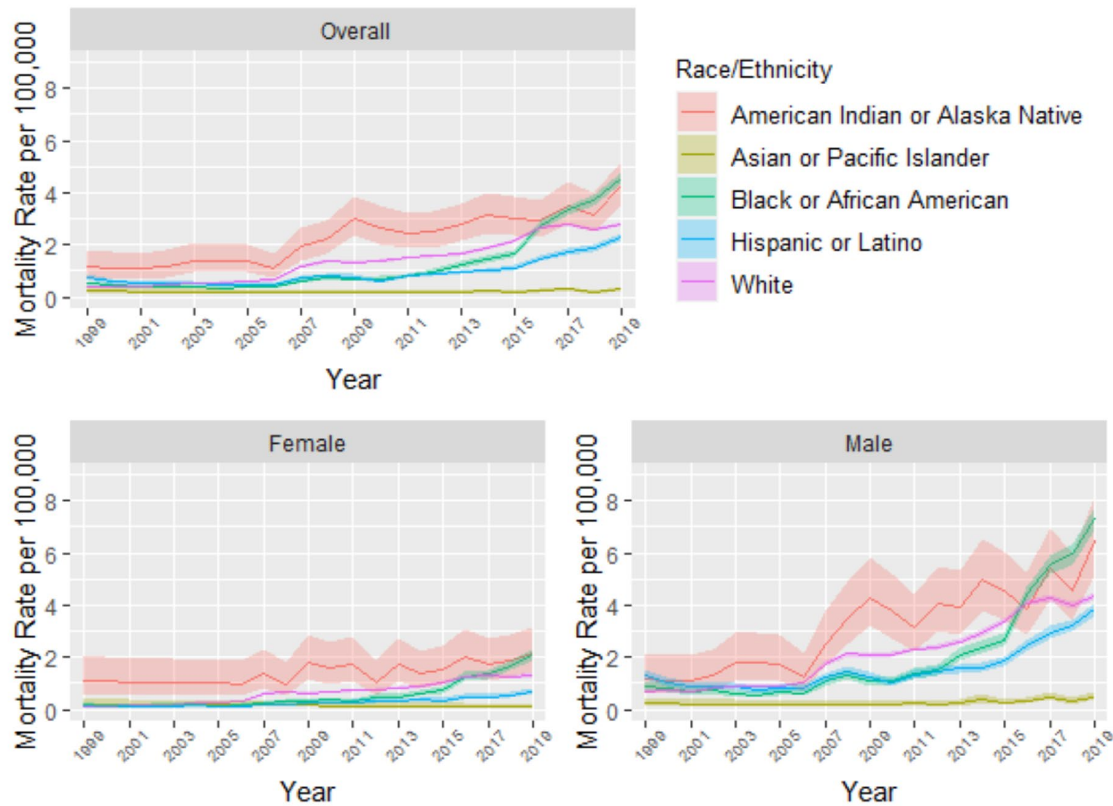

**Figure 2e:** Trends in opioid and alcohol<sup>1</sup> death rates among US men and women 12 and older by race and ethnicity

<sup>1</sup> Opioids and alcohol (underlying: R78.0, X40-45, X60-65, X85, Y10-Y15; multiple: T40.0, T40.1, T40.2, T40.3, T40.4, T40.6 and T51.0, T51.1, T51.9);
